# Supplementary material for: Preparation and in vitro release kinetics of ivermectin sustained-release bolus optimized by response surface methodology
Source: PeerJ. 2018 Jul 31;6:e5418. doi: 10.7717/peerj.5418 (PMC6074774; doi:10.7717/peerj.5418)
Supplement: Supplemental Information 1 [file peerj-06-5418-s001.xlsx]

## Sheet: Sheet1
		In vitro disintegration time of IVM bolus
	Std	Run	Blous number						Mean
			1	2	3	4	5	6
	14	1	14	15	15	16	15	13	14.6667
	2	2	3	4	3	3	3	3	3.16667
	10	3	50	50	48	49	52	52	50.1667
	1	4	6	7	7	7	8	8	7.16667
	11	5	5	4	5	6	5		5
	6	6	35	36	36	35	36	34	35.3333
	4	7	13	14	14	16	14	15	14.3333
	5	8	66	65	64	66	63	64	64.6667
	8	9	15	16	14	16	16	17	15.6667
	3	10	5	6	6	6	5	7	5.83333
	12	11	6	6	7	7	8	7	6.83333
	7	12	10	11	10	10	10	10	10.1667
	13	13	12	11	12	10	12	13	11.6667
	15	14	12	13	12	12	14	13	12.6667
	9	15	36	36	35	34	36	34	35.1667
