# Supplementary material for: Preparation and in vitro release kinetics of ivermectin sustained-release bolus optimized by response surface methodology
Source: PeerJ. 2018 Jul 31;6:e5418. doi: 10.7717/peerj.5418 (PMC6074774; doi:10.7717/peerj.5418)
Supplement: Supplemental Information 2 [file peerj-06-5418-s002.xlsx]

## Sheet: Sheet1
			In vitro release of IVM bolus
	Times(d)	Bolus						Mean	SD
		1	2	3	4	5	6
	1	45.78	53.04	44.8	48.8736	47.403	50.3076	48.3674	3.0399
	2	30.34	26.38	29.6	28.1884	33.6518	25.256	28.9027	3.00927
	3	19.06	16.6	20.08	17.4308	15.2784	19.9058	18.0592	1.9366
	4	10.5	9.5	10.02	8.8192	11.1742	8.2588	9.71203	1.07774
	5	12.3	13.1	11.6	15.52	12.4078	11.9746	12.8171	1.41504
	6	11.7	11.2	10.04	10.057	9.8028	10.5342	10.5557	0.749201
	7	8.2	7.04	7.84	8.126	7.2168	7.8056	7.70473	0.475642
	8	6.46	5.28	5.72	5.4974	5.845	6.021	5.8039	0.413459
	9	9.04	7.36	8.58	9.516	7.6056	8.6874	8.46483	0.831566
	10	9	8.26	8.56	8.6518	8.1878	9.6432	8.71713	0.539581
	11	6.28	6.54	7.08	6.487	6.7568	5.8078	6.49193	0.431571
	12	7.72	6.66	7.26	6.0356	6.5058	6.8212	6.83377	0.590266
	13	5.82	6.26	6.56	6.3756	5.567	6.1054	6.11467	0.367255
	14	6.88	6.14	6.28	7.582	6.5448	7.0216	6.7414	0.532457
	15	6.26	5.92	4.88	5.6882	5.4606	6.0024	5.70187	0.486472
	16	6.34	6.28	6.12	7.0936	5.6858	6.4718	6.33187	0.46149
	17	5.94	7.46	6.42	6.3946	6.8494	6.1562	6.5367	0.54496
	18	5.06	5.22	5.48	4.65	4.5038	4.9476	4.9769	0.360738
	19	7.2	6.64	7.5	7.294	6.443	6.8058	6.98047	0.412725
	20	5.22	4.56	5.14	5.1112	4.6814	4.8918	4.93407	0.268736
	21	5.66	5.54	6.16	6.258	5.9244	6.225	5.96123	0.305512
	22	3.24	2.88	2.68	2.5978	2.698	3.0478	2.85727	0.247958
	23	4.28	5.48	4.72	4.8358	4.5786	5.1456	4.84	0.424108
	24	5.92	5.3	5.74	4.8234	5.1866	5.4364	5.40107	0.393783
	25	7.16	6.16	7.28	7.0534	6.384	6.7472	6.79743	0.449359
	26	5.78	6.68	5.96	5.9296	6.0038	6.3666	6.12	0.336264
	27	5.72	7.06	6.26	6.5976	6.2044	5.966	6.30133	0.47431
	28	4.98	4.98	4.42	5.4422	4.6748	4.7158	4.8688	0.350994
	29	5.64	5	5.4	6.0972	4.9678	5.2762	5.39687	0.425618
	30	6.36	5.52	6.82	6.7184	6.4714	5.7238	6.26893	0.531611
	31	4.6	5.68	5.12	4.8988	5.4864	5.3472	5.18873	0.397606
	32	4.32	4.92	4.7	4.2692	4.5746	4.6296	4.5689	0.243289
	33	3.42	3.24	2.8	3.1432	2.964	3.0474	3.10243	0.216838
	34	4.88	4.4	3.96	5.0856	4.728	4.1922	4.54097	0.430252
	35	3.1	2.48	2.6	2.7094	2.6516	2.8286	2.72827	0.215673
	36	5.42	5.48	5.06	4.6972	4.9964	4.7548	5.06807	0.326933
	37	3.46	3.16	3.52	2.985	3.2606	3.4024	3.298	0.202405
	38	2.46	2.66	2.4	2.9054	2.3746	2.5138	2.5523	0.200526
	39	3.6	3.52	3.1	3.9028	3.3278	3.4708	3.4869	0.269118
	40	3.44	3.22	3.64	3.8112	3.3754	3.4704	3.49283	0.207142
	41	2.58	2.92	2.8	2.819	2.6056	2.7146	2.73987	0.131567
	42	2.46	3.02	2.8	2.6072	2.5436	2.7458	2.6961	0.202524
	43	2.9	3.22	2.7	2.5138	2.7946	3.003	2.85523	0.245456
	44	3.06	3.42	2.92	3.2494	3.0054	3.1866	3.14023	0.18191
	45	2.24	2.54	2.02	2.1056	1.9478	2.3654	2.20313	0.223345
	46	2.3	2.96	2.7	2.4094	2.2126	2.5948	2.52947	0.277915
	47	2.54	2.72	2.38	2.4096	2.0772	2.517	2.44063	0.214697
	48	3.6	3.16	3.42	3.24146	3.0678	3.2254	3.28578	0.192715
	49	5.2	5.16	4.3	4.447	4.8074	4.7452	4.7766	0.364412
	50	4.2	4.16	4.4	4.1048	3.9436	4.4146	4.20383	0.180205
	51	2.58	2.5	2.62	2.7126	2.2784	2.499	2.53167	0.147709
	52	5.06	4.62	4.38	4.2316	4.8408	4.7432	4.64593	0.303957
	53	3.58	2.94	3.28	3.0514	2.7694	3.1806	3.13357	0.28277
	54	10.86	10.52	9.92	10.1894	9.7256	10.2484	10.2439	0.408007
	55	11.46	13.82	11.46	12.3698	11.677	12.626	12.2355	0.916067
	56	9.7	10.5	9.88	10.0656	10.6202	9.5874	10.0589	0.422563
	57	13.82	14	13.48	12.7562	13.1504	14.1042	13.5518	0.524827
	58	5.62	4.92	5.26	5.0754	5.4754	6.0704	5.40353	0.414442
	59	5.34	5.02	4.52	4.8868	4.9916	4.6274	4.89763	0.29504
	60	7.18	6.08	6.88	6.2904	6.5842	6.603	6.60293	0.395287
	61	4.08	3.78	4.32	3.9074	3.5446	4.4284	4.01007	0.333491
	62	1.7	1.88	1.94	2.0094	1.805	2.2546	1.9315	0.191197

## Sheet: Sheet2
	1	22.89	45.78	26.52	53.04	22.4	44.8	24.4368	48.8736	23.7015	47.403	25.1538	50.3076
	2	15.17	30.34	13.19	26.38	14.8	29.6	14.0942	28.1884	16.8259	33.6518	12.628	25.256
	3	9.53	19.06	8.3	16.6	10.04	20.08	8.7154	17.4308	7.6392	15.2784	9.9529	19.9058
	4	5.25	10.5	4.75	9.5	5.01	10.02	4.4096	8.8192	5.5871	11.1742	4.1294	8.2588
	5	6.15	12.3	6.55	13.1	5.8	11.6	7.76	15.52	6.2039	12.4078	5.9873	11.9746
	6	5.85	11.7	5.6	11.2	5.02	10.04	5.0285	10.057	4.9014	9.8028	5.2671	10.5342
	7	4.1	8.2	3.52	7.04	3.92	7.84	4.063	8.126	3.6084	7.2168	3.9028	7.8056
	8	3.23	6.46	2.64	5.28	2.86	5.72	2.7487	5.4974	2.9225	5.845	3.0105	6.021
	9	4.52	9.04	3.68	7.36	4.29	8.58	4.758	9.516	3.8028	7.6056	4.3437	8.6874
	10	4.5	9	4.13	8.26	4.28	8.56	4.3259	8.6518	4.0939	8.1878	4.8216	9.6432
	11	3.14	6.28	3.27	6.54	3.54	7.08	3.2435	6.487	3.3784	6.7568	2.9039	5.8078
	12	3.86	7.72	3.33	6.66	3.63	7.26	3.0178	6.0356	3.2529	6.5058	3.4106	6.8212
	13	2.91	5.82	3.13	6.26	3.28	6.56	3.1878	6.3756	2.7835	5.567	3.0527	6.1054
	14	3.44	6.88	3.07	6.14	3.14	6.28	3.791	7.582	3.2724	6.5448	3.5108	7.0216
	15	3.13	6.26	2.96	5.92	2.44	4.88	2.8441	5.6882	2.7303	5.4606	3.0012	6.0024
	16	3.17	6.34	3.14	6.28	3.06	6.12	3.5468	7.0936	2.8429	5.6858	3.2359	6.4718
	17	2.97	5.94	3.73	7.46	3.21	6.42	3.1973	6.3946	3.4247	6.8494	3.0781	6.1562
	18	2.53	5.06	2.61	5.22	2.74	5.48	2.325	4.65	2.2519	4.5038	2.4738	4.9476
	19	3.6	7.2	3.32	6.64	3.75	7.5	3.647	7.294	3.2215	6.443	3.4029	6.8058
	20	2.61	5.22	2.28	4.56	2.57	5.14	2.5556	5.1112	2.3407	4.6814	2.4459	4.8918
	21	2.83	5.66	2.77	5.54	3.08	6.16	3.129	6.258	2.9622	5.9244	3.1125	6.225
	22	1.62	3.24	1.44	2.88	1.34	2.68	1.2989	2.5978	1.349	2.698	1.5239	3.0478
	23	2.14	4.28	2.74	5.48	2.36	4.72	2.4179	4.8358	2.2893	4.5786	2.5728	5.1456
	24	2.96	5.92	2.65	5.3	2.87	5.74	2.4117	4.8234	2.5933	5.1866	2.7182	5.4364
	25	3.58	7.16	3.08	6.16	3.64	7.28	3.5267	7.0534	3.192	6.384	3.3736	6.7472
	26	2.89	5.78	3.34	6.68	2.98	5.96	2.9648	5.9296	3.0019	6.0038	3.1833	6.3666
	27	2.86	5.72	3.53	7.06	3.13	6.26	3.2988	6.5976	3.1022	6.2044	2.983	5.966
	28	2.49	4.98	2.49	4.98	2.21	4.42	2.7211	5.4422	2.3374	4.6748	2.3579	4.7158
	29	2.82	5.64	2.5	5	2.7	5.4	3.0486	6.0972	2.4839	4.9678	2.6381	5.2762
	30	3.18	6.36	2.76	5.52	3.41	6.82	3.3592	6.7184	3.2357	6.4714	2.8619	5.7238
	31	2.3	4.6	2.84	5.68	2.56	5.12	2.4494	4.8988	2.7432	5.4864	2.6736	5.3472
	32	2.16	4.32	2.46	4.92	2.35	4.7	2.1346	4.2692	2.2873	4.5746	2.3148	4.6296
	33	1.71	3.42	1.62	3.24	1.4	2.8	1.5716	3.1432	1.482	2.964	1.5237	3.0474
	34	2.44	4.88	2.2	4.4	1.98	3.96	2.5428	5.0856	2.364	4.728	2.0961	4.1922
	35	1.55	3.1	1.24	2.48	1.3	2.6	1.3547	2.7094	1.3258	2.6516	1.4143	2.8286
	36	2.71	5.42	2.74	5.48	2.53	5.06	2.3486	4.6972	2.4982	4.9964	2.3774	4.7548
	37	1.73	3.46	1.58	3.16	1.76	3.52	1.4925	2.985	1.6303	3.2606	1.7012	3.4024
	38	1.23	2.46	1.33	2.66	1.2	2.4	1.4527	2.9054	1.1873	2.3746	1.2569	2.5138
	39	1.8	3.6	1.76	3.52	1.55	3.1	1.9514	3.9028	1.6639	3.3278	1.7354	3.4708
	40	1.72	3.44	1.61	3.22	1.82	3.64	1.9056	3.8112	1.6877	3.3754	1.7352	3.4704
	41	1.29	2.58	1.46	2.92	1.4	2.8	1.4095	2.819	1.3028	2.6056	1.3573	2.7146
	42	1.23	2.46	1.51	3.02	1.4	2.8	1.3036	2.6072	1.2718	2.5436	1.3729	2.7458
	43	1.45	2.9	1.61	3.22	1.35	2.7	1.2569	2.5138	1.3973	2.7946	1.5015	3.003
	44	1.53	3.06	1.71	3.42	1.46	2.92	1.6247	3.2494	1.5027	3.0054	1.5933	3.1866
	45	1.12	2.24	1.27	2.54	1.01	2.02	1.0528	2.1056	0.9739	1.9478	1.1827	2.3654
	46	1.15	2.3	1.48	2.96	1.35	2.7	1.2047	2.4094	1.1063	2.2126	1.2974	2.5948
	47	1.27	2.54	1.36	2.72	1.19	2.38	1.2048	2.4096	1.0386	2.0772	1.2585	2.517
	48	1.8	3.6	1.58	3.16	1.71	3.42	1.62073	3.24146	1.5339	3.0678	1.6127	3.2254
	49	2.6	5.2	2.58	5.16	2.15	4.3	2.2235	4.447	2.4037	4.8074	2.3726	4.7452
	50	2.1	4.2	2.08	4.16	2.2	4.4	2.0524	4.1048	1.9718	3.9436	2.2073	4.4146
	51	1.29	2.58	1.25	2.5	1.31	2.62	1.3563	2.7126	1.1392	2.2784	1.2495	2.499
	52	2.53	5.06	2.31	4.62	2.19	4.38	2.1158	4.2316	2.4204	4.8408	2.3716	4.7432
	53	1.79	3.58	1.47	2.94	1.64	3.28	1.5257	3.0514	1.3847	2.7694	1.5903	3.1806
	54	5.43	10.86	5.26	10.52	4.96	9.92	5.0947	10.1894	4.8628	9.7256	5.1242	10.2484
	55	5.73	11.46	6.91	13.82	5.73	11.46	6.1849	12.3698	5.8385	11.677	6.313	12.626
	56	4.85	9.7	5.25	10.5	4.94	9.88	5.0328	10.0656	5.3101	10.6202	4.7937	9.5874
	57	6.91	13.82	7	14	6.74	13.48	6.3781	12.7562	6.5752	13.1504	7.0521	14.1042
	58	2.81	5.62	2.46	4.92	2.63	5.26	2.5377	5.0754	2.7377	5.4754	3.0352	6.0704
	59	2.67	5.34	2.51	5.02	2.26	4.52	2.4434	4.8868	2.4958	4.9916	2.3137	4.6274
	60	3.59	7.18	3.04	6.08	3.44	6.88	3.1452	6.2904	3.2921	6.5842	3.3015	6.603
	61	2.04	4.08	1.89	3.78	2.16	4.32	1.9537	3.9074	1.7723	3.5446	2.2142	4.4284
	62	0.85	1.7	0.94	1.88	0.97	1.94	1.0047	2.0094	0.9025	1.805	1.1273	2.2546

## Sheet: Sheet3
	45.78	53.04	44.8	48.8736	47.403	50.3076
	30.34	26.38	29.6	28.1884	33.6518	25.256
	19.06	16.6	20.08	17.4308	15.2784	19.9058
	10.5	9.5	10.02	8.8192	11.1742	8.2588
	12.3	13.1	11.6	15.52	12.4078	11.9746
	11.7	11.2	10.04	10.057	9.8028	10.5342
	8.2	7.04	7.84	8.126	7.2168	7.8056
	6.46	5.28	5.72	5.4974	5.845	6.021
	9.04	7.36	8.58	9.516	7.6056	8.6874
	9	8.26	8.56	8.6518	8.1878	9.6432
	6.28	6.54	7.08	6.487	6.7568	5.8078
	7.72	6.66	7.26	6.0356	6.5058	6.8212
	5.82	6.26	6.56	6.3756	5.567	6.1054
	6.88	6.14	6.28	7.582	6.5448	7.0216
	6.26	5.92	4.88	5.6882	5.4606	6.0024
	6.34	6.28	6.12	7.0936	5.6858	6.4718
	5.94	7.46	6.42	6.3946	6.8494	6.1562
	5.06	5.22	5.48	4.65	4.5038	4.9476
	7.2	6.64	7.5	7.294	6.443	6.8058
	5.22	4.56	5.14	5.1112	4.6814	4.8918
	5.66	5.54	6.16	6.258	5.9244	6.225
	3.24	2.88	2.68	2.5978	2.698	3.0478
	4.28	5.48	4.72	4.8358	4.5786	5.1456
	5.92	5.3	5.74	4.8234	5.1866	5.4364
	7.16	6.16	7.28	7.0534	6.384	6.7472
	5.78	6.68	5.96	5.9296	6.0038	6.3666
	5.72	7.06	6.26	6.5976	6.2044	5.966
	4.98	4.98	4.42	5.4422	4.6748	4.7158
	5.64	5	5.4	6.0972	4.9678	5.2762
	6.36	5.52	6.82	6.7184	6.4714	5.7238
	4.6	5.68	5.12	4.8988	5.4864	5.3472
	4.32	4.92	4.7	4.2692	4.5746	4.6296
	3.42	3.24	2.8	3.1432	2.964	3.0474
	4.88	4.4	3.96	5.0856	4.728	4.1922
	3.1	2.48	2.6	2.7094	2.6516	2.8286
	5.42	5.48	5.06	4.6972	4.9964	4.7548
	3.46	3.16	3.52	2.985	3.2606	3.4024
	2.46	2.66	2.4	2.9054	2.3746	2.5138
	3.6	3.52	3.1	3.9028	3.3278	3.4708
	3.44	3.22	3.64	3.8112	3.3754	3.4704
	2.58	2.92	2.8	2.819	2.6056	2.7146
	2.46	3.02	2.8	2.6072	2.5436	2.7458
	2.9	3.22	2.7	2.5138	2.7946	3.003
	3.06	3.42	2.92	3.2494	3.0054	3.1866
	2.24	2.54	2.02	2.1056	1.9478	2.3654
	2.3	2.96	2.7	2.4094	2.2126	2.5948
	2.54	2.72	2.38	2.4096	2.0772	2.517
	3.6	3.16	3.42	3.24146	3.0678	3.2254
	5.2	5.16	4.3	4.447	4.8074	4.7452
	4.2	4.16	4.4	4.1048	3.9436	4.4146
	2.58	2.5	2.62	2.7126	2.2784	2.499
	5.06	4.62	4.38	4.2316	4.8408	4.7432
	3.58	2.94	3.28	3.0514	2.7694	3.1806
	10.86	10.52	9.92	10.1894	9.7256	10.2484
	11.46	13.82	11.46	12.3698	11.677	12.626
	9.7	10.5	9.88	10.0656	10.6202	9.5874
	13.82	14	13.48	12.7562	13.1504	14.1042
	5.62	4.92	5.26	5.0754	5.4754	6.0704
	5.34	5.02	4.52	4.8868	4.9916	4.6274
	7.18	6.08	6.88	6.2904	6.5842	6.603
	4.08	3.78	4.32	3.9074	3.5446	4.4284
	1.7	1.88	1.94	2.0094	1.805	2.2546
