# Supplementary material for: Preparation and in vitro release kinetics of ivermectin sustained-release bolus optimized by response surface methodology
Source: PeerJ. 2018 Jul 31;6:e5418. doi: 10.7717/peerj.5418 (PMC6074774; doi:10.7717/peerj.5418)
Supplement: Supplemental Information 4 [file peerj-06-5418-s004.xlsx]

## Sheet: Sheet1
					In vitro cumulative percent release of IVM bolus
		Times(d)	Bolus						Mean
			1	2	3	4	5	6
		1	9.99564	11.5818	9.781	10.6711	10.35	10.9842	10.5606
		2	16.6213	17.3426	16.2419	16.8258	17.6976	16.4986	16.8713
		3	20.783	20.9669	20.6249	20.6316	21.0334	20.8448	20.8141
		4	23.0752	23.0393	22.8117	22.5572	23.4732	22.6481	22.9341
		5	25.7617	25.8996	25.3447	25.9459	26.1824	25.2626	25.7328
		6	28.3168	28.345	27.536	28.1417	28.3227	27.5627	28.0375
		7	30.1086	29.8837	29.2478	29.9159	29.8984	29.2669	29.7202
		8	31.5178	31.0383	30.4982	31.1162	31.1746	30.5816	30.9878
		9	33.492	32.6446	32.3706	33.194	32.8352	32.4784	32.8358
		10	35.4581	34.4488	34.2389	35.083	34.623	34.5839	34.7393
		11	36.8311	35.8783	35.7845	36.4994	36.0983	35.852	36.1572
		12	38.5148	37.3316	37.3686	37.8172	37.5187	37.3413	37.6487
		13	39.7856	38.6987	38.7999	39.2093	38.7342	38.6744	38.9837
		14	41.2877	40.0387	40.1692	40.8647	40.1632	40.2075	40.4552
		15	42.6527	41.3321	41.2355	42.1067	41.3555	41.518	41.7001
		16	44.0356	42.7054	42.5704	43.6555	42.5969	42.9311	43.0825
		17	45.3345	44.3339	43.9741	45.0517	44.0924	44.2752	44.5103
		18	46.4392	45.4728	45.1702	46.067	45.0758	45.3555	45.5968
		19	48.011	46.9204	46.8089	47.6596	46.4826	46.8415	47.1207
		20	49.1503	47.9151	47.9332	48.7755	47.5047	47.9096	48.1981
		21	50.3859	49.1251	49.2789	50.1419	48.7983	49.2687	49.4998
		22	51.0947	49.7545	49.8647	50.7091	49.3873	49.9342	50.1241
		23	52.0289	50.9514	50.8938	51.765	50.387	51.0577	51.1806
		24	53.3218	52.1065	52.1461	52.8181	51.5195	52.2447	52.3594
		25	54.8832	53.4499	53.7335	54.3582	52.9134	53.7179	53.8427
		26	56.1467	54.9088	55.0331	55.6528	54.2242	55.1079	55.1789
		27	57.3934	56.4511	56.4007	57.0934	55.5789	56.4106	56.5547
		28	58.4814	57.5405	57.3668	58.2816	56.5996	57.4402	57.6184
		29	59.7132	58.6326	58.5466	59.6129	57.6843	58.5922	58.797
		30	61.1023	59.8368	60.0354	61.0798	59.0972	59.842	60.1656
		31	62.107	61.077	61.1554	62.1494	60.2952	61.0095	61.2989
		32	63.0515	62.1528	62.1811	63.0815	61.294	62.0203	62.2969
		33	63.7967	62.8582	62.7935	63.7678	61.9411	62.6857	62.9738
		34	64.8611	63.8202	63.6592	64.8782	62.9734	63.601	63.9655
		35	65.5395	64.3605	64.2261	65.4698	63.5524	64.2186	64.5611
		36	66.7219	65.5561	65.3315	66.4954	64.6433	65.2568	65.6675
		37	67.4792	66.246	66.0985	67.1471	65.3552	65.9997	66.3876
		38	68.0181	66.8288	66.6246	67.7815	65.8737	66.5485	66.9459
		39	68.8044	67.5978	67.3027	68.6336	66.6003	67.3063	67.7075
		40	69.5552	68.3009	68.0996	69.4658	67.3373	68.0641	68.4705
		41	70.1177	68.9394	68.7102	70.0813	67.9062	68.6568	69.0686
		42	70.6529	69.5989	69.3197	70.6505	68.4616	69.2563	69.6566
		43	71.288	70.3031	69.9084	71.1994	69.0717	69.912	70.2804
		44	71.9546	71.051	70.5448	71.9089	69.7279	70.6077	70.9658
		45	72.4419	71.6048	70.9848	72.3686	70.1532	71.1242	71.4463
		46	72.9448	72.2495	71.5761	72.8947	70.6363	71.6907	71.9987
		47	73.4994	72.8442	72.0964	73.4208	71.0899	72.2403	72.5318
		48	74.286	73.5363	72.8441	74.1285	71.7597	72.9445	73.2499
		49	75.4212	74.6631	73.7838	75.0995	72.8093	73.9806	74.2929
		50	76.3369	75.5719	74.7466	75.9957	73.6704	74.9445	75.211
		51	76.8999	76.118	75.3181	76.588	74.1679	75.4901	75.7637
		52	78.0045	77.1267	76.276	77.5119	75.2248	76.5258	76.7783
		53	78.7876	77.77	76.9903	78.1782	75.8295	77.2202	77.4626
		54	81.1573	80.0677	79.1553	80.4029	77.953	79.4579	79.699
		55	83.6607	83.0847	81.6583	83.1038	80.5025	82.2146	82.3708
		56	85.7806	85.378	83.817	85.3015	82.8214	84.3079	84.5677
		57	88.8	88.434	86.7585	88.0867	85.6926	87.3875	87.5266
		58	90.0268	89.5104	87.9086	89.1949	86.8881	88.7129	88.7069
		59	91.1933	90.6052	88.8969	90.2618	87.978	89.7232	89.7764
		60	92.7618	91.9316	90.3982	91.6353	89.4156	91.1649	91.2179
		61	93.6508	92.7587	91.3405	92.4884	90.1895	92.1318	92.0933
		62	94.0232	93.1698	91.7651	92.9272	90.5836	92.6241	92.5155
